# Supplementary material for: Night Vision: A New Blueprint for Bedside Ultrasound Training in Medical Residency
Source: Research Square preprint supplement (doi:10.21203/rs.3.rs-5760020/v1), 2025-04-21
Supplement: Supplementary file 1 [file 1daaeca7ded8e348a542cd9f.pdf]

Resident Name:

Date:

| Initial setup: Cardiac preset, minimum depth, gain very high                                                   |           |                                |       |          |       |         |              |         | Score |          |
|----------------------------------------------------------------------------------------------------------------|-----------|--------------------------------|-------|----------|-------|---------|--------------|---------|-------|----------|
| Time limit: 8 minutes                                                                                          |           |                                |       |          |       |         |              |         | Total | Max      |
| <b>Probe selection</b> - "Please choose the most appropriate probe for a focused lung and abdominal exam")     |           |                                |       |          |       |         |              |         |       | 1 point  |
| <ul style="list-style-type: none"> <li>1 point for phased array probe</li> </ul>                               |           |                                |       |          |       |         |              |         |       |          |
| <b>Preset selection</b> - "Please select the exam preset on the machine for a focused lung exam"               |           |                                |       |          |       |         |              |         |       | 1 point  |
| <ul style="list-style-type: none"> <li>1 point for lung (or abdomen if preference / no lung preset)</li> </ul> |           |                                |       |          |       |         |              |         |       |          |
|                                                                                                                | Structure |                                | Gain  |          | Depth |         | Probe marker |         |       |          |
|                                                                                                                | Score     | Max                            | Score | Max      | Score | Max     | Score        | Max     |       |          |
| <b>Lung sliding</b>                                                                                            |           | 2 points<br>• Ribs<br>• Pleura |       | 2 points |       | 1 point |              | 1 point |       | 6 points |
| <b>Lung A-lines</b>                                                                                            |           | 1 point<br>• Min 2 a-lines     |       |          |       | 1 point |              |         |       | 2 points |

| <b>Preset selection</b> - "Please select the exam preset on the machine for a focused abdominal exam"   |           |                                                 |       |          |       |         |              |         |  | 1 point  |
|---------------------------------------------------------------------------------------------------------|-----------|-------------------------------------------------|-------|----------|-------|---------|--------------|---------|--|----------|
| <ul style="list-style-type: none"> <li>1 point for abdomen preset (or if no change required)</li> </ul> |           |                                                 |       |          |       |         |              |         |  |          |
|                                                                                                         | Structure |                                                 | Gain  |          | Depth |         | Probe marker |         |  |          |
|                                                                                                         | Score     | Max                                             | Score | Max      | Score | Max     | Score        | Max     |  |          |
| <b>RUQ</b>                                                                                              |           | 3 points<br>• Diaphragm<br>• Liver<br>• kidney  |       | 2 points |       | 1 point |              | 1 point |  | 7 points |
| <b>LUQ</b>                                                                                              |           | 3 points<br>• Diaphragm<br>• Spleen<br>• kidney |       |          |       | 1 point |              | 1 point |  | 5 points |
| <b>Kidney longitudinal</b>                                                                              |           | 1 point<br>• Full view pole to pole             |       |          |       | 1 point |              | 1 point |  | 3 points |
| <b>Transverse bladder</b>                                                                               |           | 1 point<br>• Max dimension                      |       | 2 points |       | 1 point |              | 1 point |  | 5 points |
| <b>Sagittal bladder</b>                                                                                 |           | 1 point<br>• Max dimension                      |       |          |       | 1 point |              | 1 point |  | 3 points |

|                          |
|--------------------------|
| <b>Total Score: / 34</b> |
|--------------------------|

Gain score:

- 1 point - Some adjustment in appropriate direction, but inadequate/suboptimal
- 2 points - Gain optimized (or if no adjustment necessary)

Depth score:

- 1 point - Structures of interest take up >2/3 of screen (or if no adjustment necessary)

Probe marker score:

- 1 point - Probe marker should be towards head unless specifically indicated by view
