# Supplementary material for: Night Vision: A New Blueprint for Bedside Ultrasound Training in Medical Residency
Source: Research Square preprint supplement (doi:10.21203/rs.3.rs-5760020/v1), 2025-04-21
Supplement: Supplementary file 2 [file b758ed3e6aa559395ab8f001.pdf]

# Pre-Course Knowledge Assessment

Please complete the knowledge assessment below.

Thank you!

---

What is your full name?

---

---

Have you had any formal education in point-of-care ultrasound prior to this academic year?

- ☐ Yes  
☐ No

---

What education did you receive?

- ☐ Single training session  
☐ Multiple training sessions  
☐ Longitudinal training experience  
☐ Other

---

Briefly describe your prior education:

---

---

How comfortable are you with using point-of-care ultrasound?

- ☐ Very uncomfortable - have no experience, do not know differences in probes/how to hold them, do not know how to adjust basic settings  
☐ Uncomfortable - have some knowledge of how to use probes and adjust settings, but need guidance in practice on patients  
☐ Neutral - know how to use probes and adjust settings, can identify normal structures with guidance  
☐ Comfortable - know how to use the ultrasound and identify normal structures and some abnormal findings in patients who are easy to examine (thin body habitus, can follow commands) without guidance  
☐ Very comfortable - can do all the above in patients who are difficult to examine and teach others

---

Ultrasound has a valuable role in the management of patients in the inpatient setting.

- ☐ Strongly disagree  
☐ Disagree  
☐ Neutral  
☐ Agree  
☐ Strongly agree

---

Ultrasound has a valuable role in the management of patients in the outpatient setting.

- ☐ Strongly disagree  
☐ Disagree  
☐ Neutral  
☐ Agree  
☐ Strongly agree

---

With adequate training and availability of equipment, how likely are you to integrate point-of-care ultrasound into your medical decision making when applicable?

- ☐ Very unlikely  
☐ Unlikely  
☐ Neutral  
☐ Likely  
☐ Very likely

---

Briefly describe how you may do this:

---

- 1 How would you optimize the following image?
- ☐ Decrease the gain  
☐ Increase the gain  
☐ Decrease the depth  
☐ Increase the depth  
 (Please see video below.)
- 
- 

- 2 How would you optimize the following image?
- ☐ Decrease the gain  
☐ Increase the gain  
☐ Decrease the depth  
☐ Increase the depth  
 (Please see video below.)
- 
- 

- 3 In order to maximize image quality, the probe should be aligned \_\_\_\_\_ to the object of interest.
- ☐ Parallel  
☐ Perpendicular  
☐ 45 degree angle  
☐ 30 degree angle
- 
- 

**Select the echogenicity of the following tissues in reference to a normal liver:**

|                                           | Anechoic              | Hypoechoic            | Isoechoic             | Hyperechoic           |
|-------------------------------------------|-----------------------|-----------------------|-----------------------|-----------------------|
| 4 Spleen                                  | <input type="radio"/> | <input type="radio"/> | <input type="radio"/> | <input type="radio"/> |
| 5 Fluid (blood, ascites, effusions, etc.) | <input type="radio"/> | <input type="radio"/> | <input type="radio"/> | <input type="radio"/> |
| 6 Pleura                                  | <input type="radio"/> | <input type="radio"/> | <input type="radio"/> | <input type="radio"/> |
| 7 Renal cortex                            | <input type="radio"/> | <input type="radio"/> | <input type="radio"/> | <input type="radio"/> |
| 8 Diaphragm                               | <input type="radio"/> | <input type="radio"/> | <input type="radio"/> | <input type="radio"/> |

---



---



---



---



---

- 
- 9 Which probe would be most suitable for examining the pleural space?
- ☐ Linear probe  
☐ Phased array probe  
☐ Curvilinear probe
- 
- 10 A focused lung ultrasound is performed on a patient with acute hypoxic respiratory failure, with the following clip representative of all lung fields. What is the most likely diagnosis out of the options listed?
- ☐ COPD/asthma  
☐ Congestive heart failure  
☐ Pneumothorax  
☐ Pulmonary embolism  
(Please see video below.)
- 
- 11 A 65yo man presents with shortness of breath, cough, and hypoxia requiring 6L nasal cannula. A focused lung ultrasound is performed, with the results shown in the following clip. What is the next step for management?
- ☐ Perform thoracentesis  
☐ Initiate antibiotic therapy  
☐ Consult CT Surgery for chest tube placement  
☐ Obtain CTA Chest to evaluate for pulmonary embolism  
(Please see video below.)
- 
- 12 A 35yo woman with cirrhosis presents with 2 day history of abdominal pain and tenderness. A focused abdominal ultrasound was obtained and is shown below. What is the next step for management?
- ☐ Start aggressive bowel regimen  
☐ Perform a diagnostic paracentesis  
☐ Insert nasogastric tube for suctioning  
☐ Initiate empiric antibiotic therapy  
(Please see video below.)
- 
- 13 Which artifacts are present in the following image? (Select all that apply)
- ☐ Side lobe artifact  
☐ Reverberation artifact  
☐ Acoustic shadowing  
☐ Mirror image artifact  
(Please see video below.)
- 

Total score

---
